# Supplementary material
Source: Springer Nature journal article supplement (https://repositorio.tec.mx/bitstream/handle/11285/613679/12864_2006_958_MOESM9_ESM.pdf)

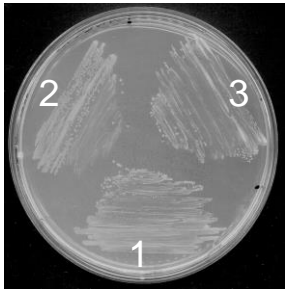

**+ dT**

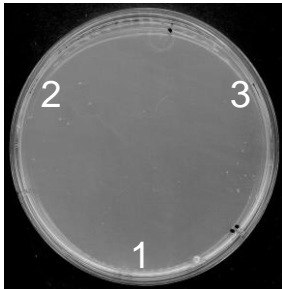

**- dT**

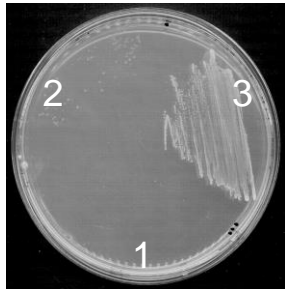

**+ PtCH<sub>2</sub>OH**

Supplement: MOESM9 [file 12864_2006_958_MOESM9_ESM.pdf]
